# Supplementary material for: Diastereoselective approach to rationally design tetrahydro-β-carboline–isatin conjugates as potential SERMs against breast cancer
Source: PubMed Central journal article supplement — RSC Adv. 2019 Mar 28;9(17):9809–19. doi: 10.1039/c9ra00744j (PMC9062147; doi:10.1039/c9ra00744j), 2019-03-28
Supplement: RA-009-C9RA00744J-s001.pdf [file RA-009-C9RA00744J-s001.pdf]

## **Diastereoselective approach to rationally designed tetrahydro- $\beta$ -carboline- isatin conjugates as Potential SERMs against breast cancer**

Bharvi Sharma<sup>a</sup>, Amandeep Singh<sup>a</sup>, Liang Gu<sup>b</sup>, Sourav Taru Saha<sup>b</sup>, Ashona Singh-Pillay<sup>c</sup>, Nosipho Cele<sup>c</sup>, Parvesh Singh<sup>c</sup>, Mandeep Kaur<sup>b\*</sup>, Vipin Kumar<sup>a\*</sup>

<sup>a</sup> Department of Chemistry, Guru Nanak Dev University, Amritsar 143005, India

<sup>b</sup> School of Molecular and Cell Biology, University of the Witwatersrand, Private Bag 3, Wits, 2050 Johannesburg, South Africa

<sup>c</sup> School of Chemistry and Physics, University of KwaZulu Natal, P/Bag X54001, Westville, Durban 4000, South Africa

\*Corresponding Author. Tel: +91 183 2258802-09\*3320 (V.K.); Fax: +91 183 2258819-20, Email address: [vipan\\_org@yahoo.com](mailto:vipan_org@yahoo.com) (V. Kumar)

**Scanned <sup>1</sup>H and <sup>13</sup>C NMR spectra of representative compounds**

<sup>1</sup>H NMR of 2-[1-[3-(2,3-Dioxo-2,3-dihydro-indol-1-yl)-propyl]-1H-[1,2,3]triazol-4-ylmethyl]-2,3,4,9-tetrahydro-1H-β-carboline-3-carboxylic acid ethyl ester (**8b**)

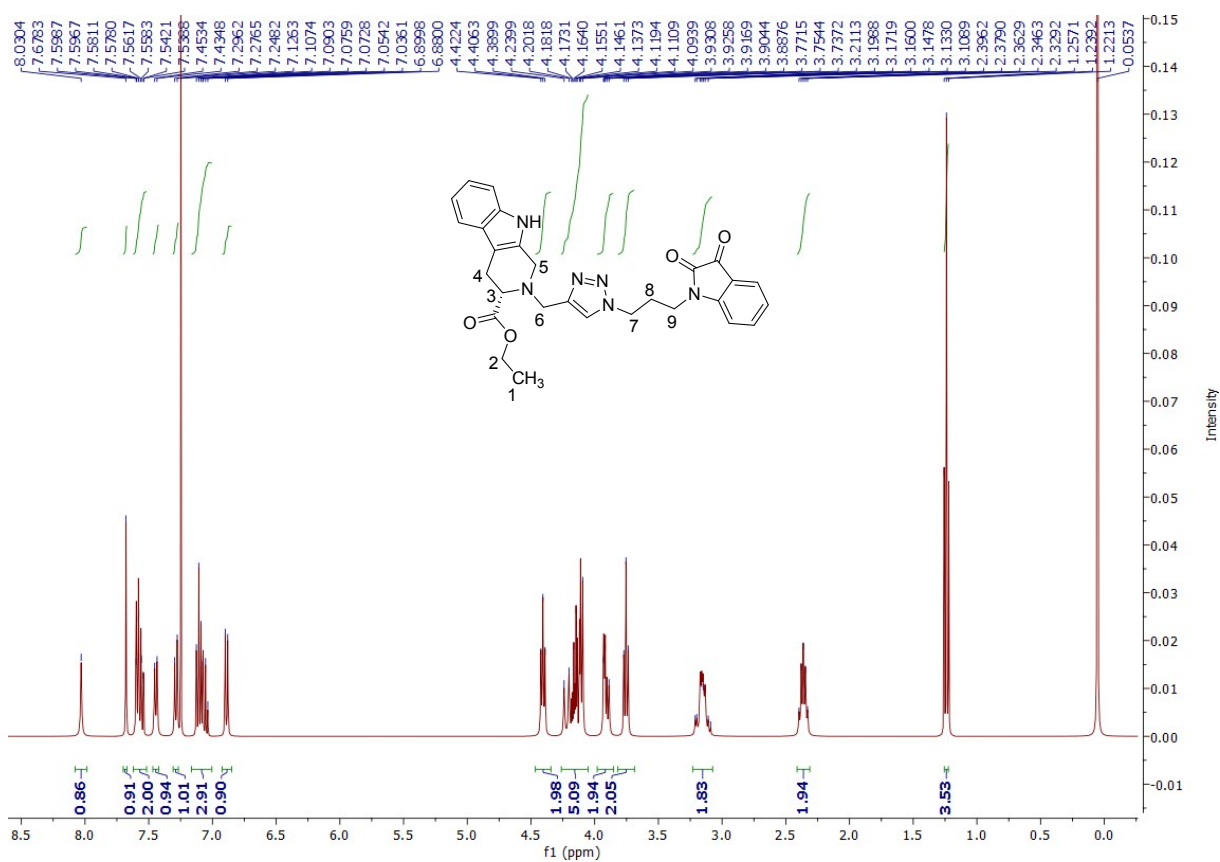

$^{13}\text{C}$  NMR of 2-{1-[3-(2,3-Dioxo-2,3-dihydro-indol-1-yl)-propyl]-1H-[1,2,3]triazol-4-ylmethyl}-2,3,4,9-tetrahydro-1H- $\beta$ -carboline-3-carboxylic acid ethyl ester (**8b**)

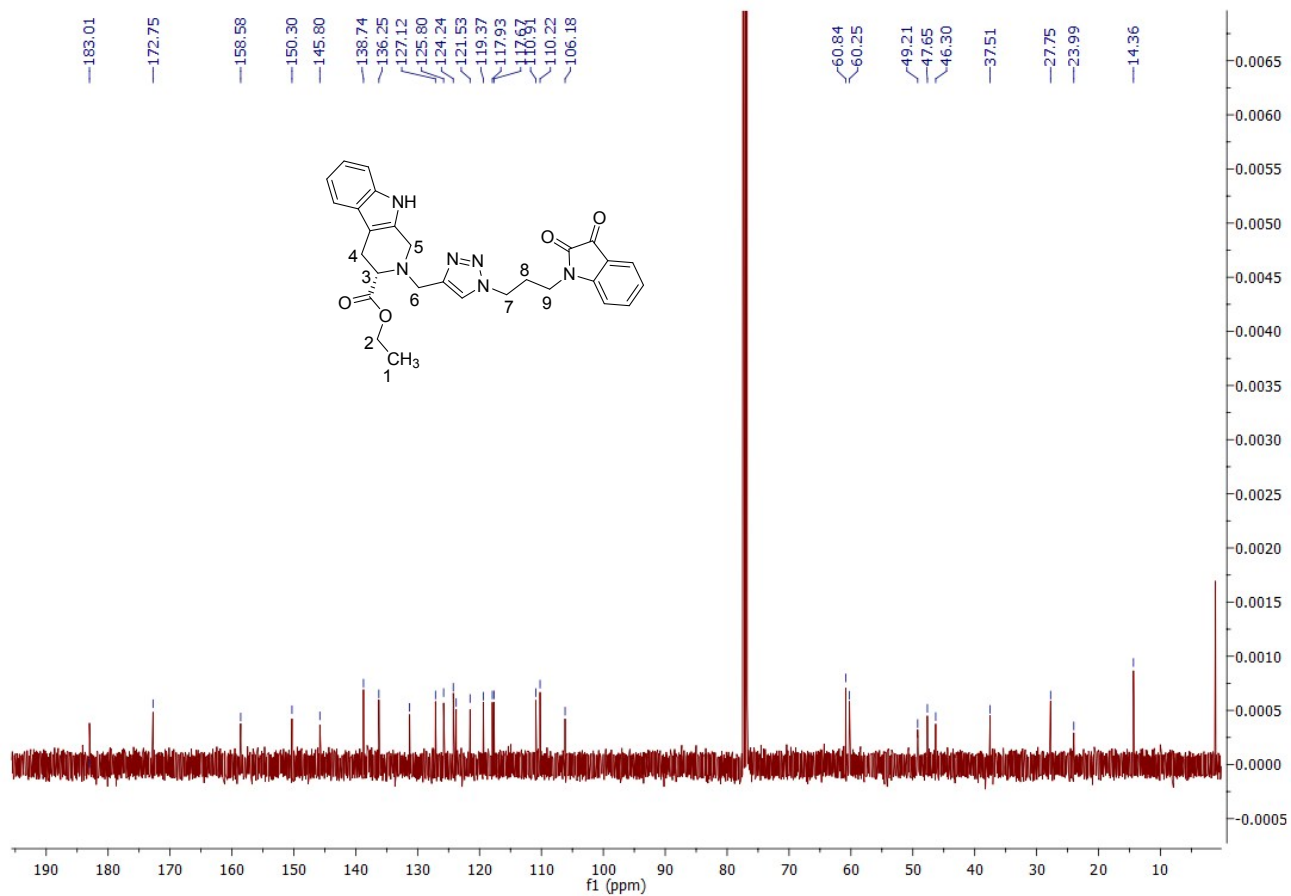

<sup>1</sup>H NMR of 2-{1-[4-(2,3-Dioxo-2,3-dihydro-indol-1-yl)-butyl]-1H-[1,2,3]triazol-4-ylmethyl}-2,3,4,9-tetrahydro-1H-β-carboline-3-carboxylic acid ethyl ester (**8c**)

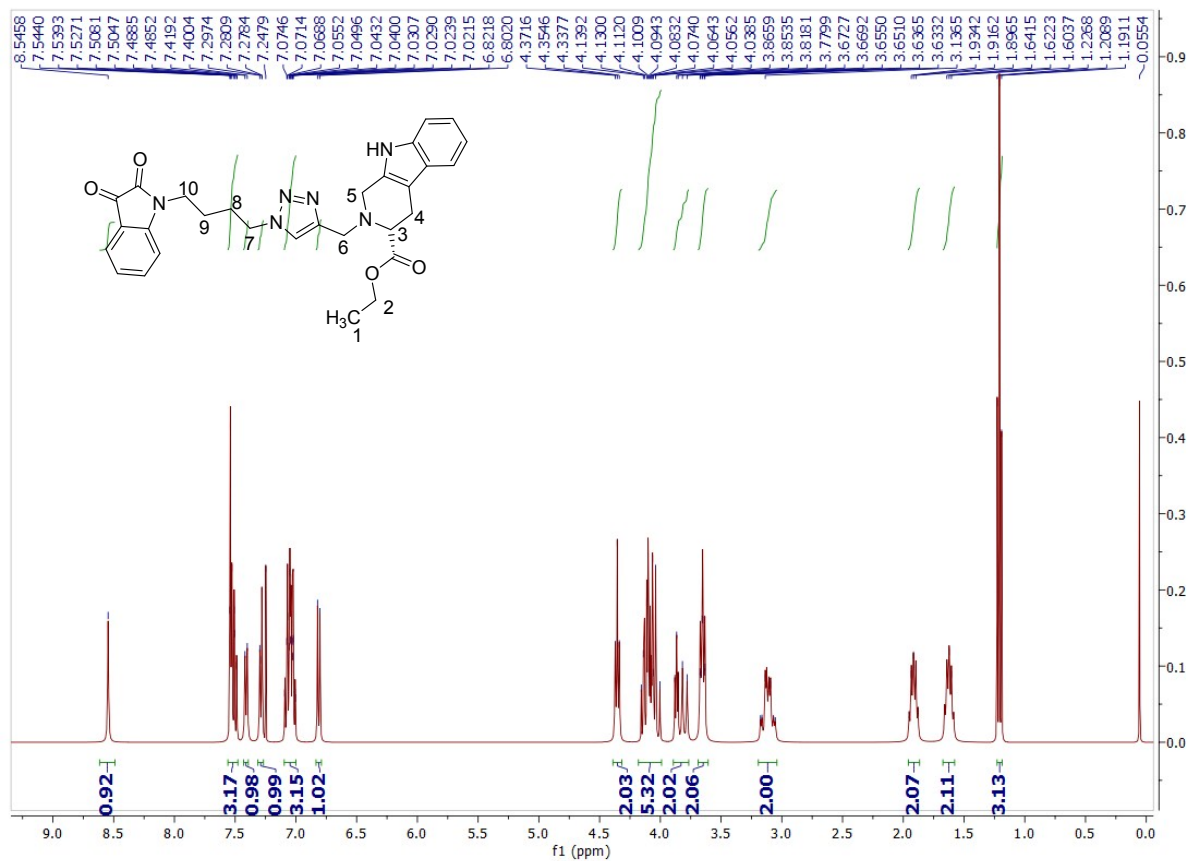

$^{13}\text{C}$  NMR of 2-[1-[4-(2,3-Dioxo-2,3-dihydro-indol-1-yl)-butyl]-1H-[1,2,3]triazol-4-ylmethyl]-2,3,4,9-tetrahydro-1H- $\beta$ -carboline-3-carboxylic acid ethyl ester (**8c**)

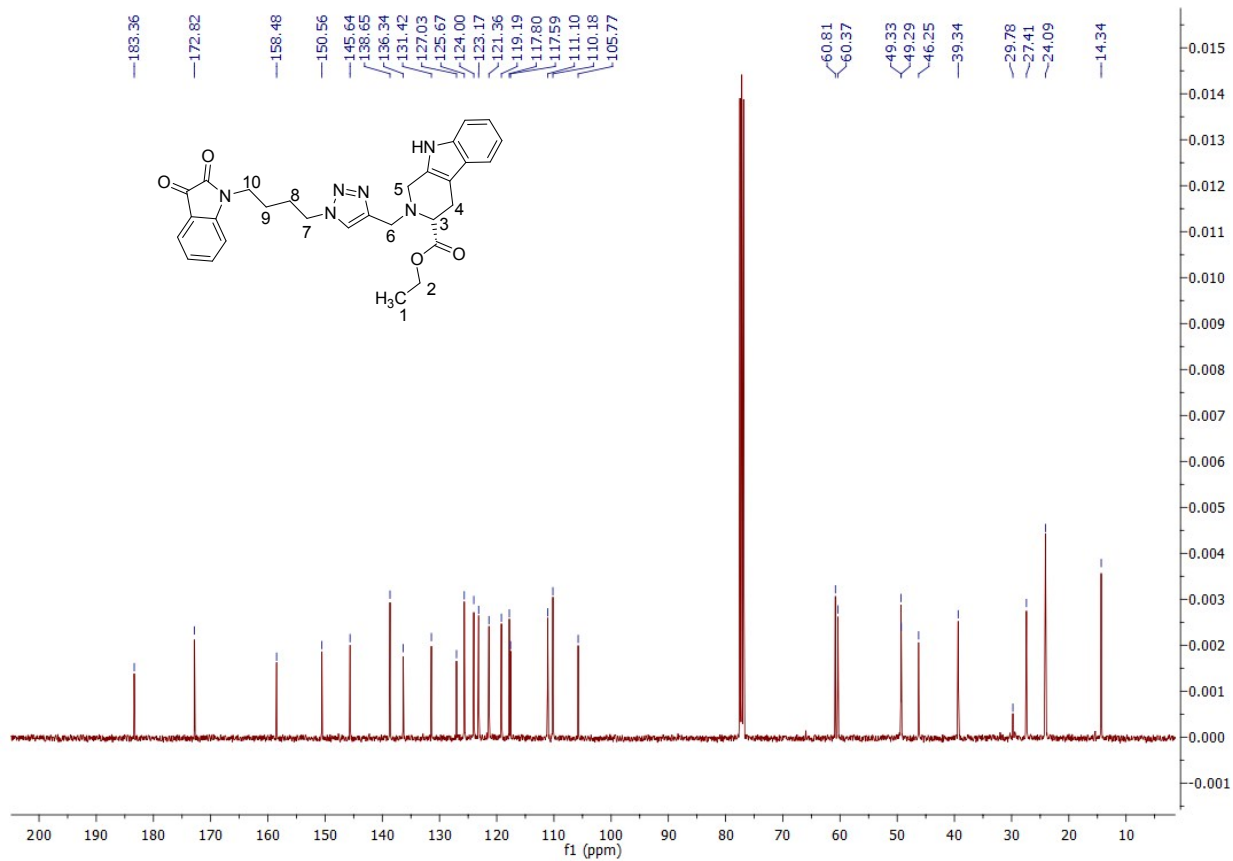

<sup>1</sup>H NMR of 2-[1-[4-(2,3-Dioxo-2,3-dihydro-indol-1-yl)-butyl]-1H-[1,2,3]triazol-4-ylmethyl]-1-methyl-2,3,4,9-tetrahydro-1H-β-carboline-3-carboxylic acid ethyl ester (**8f**)

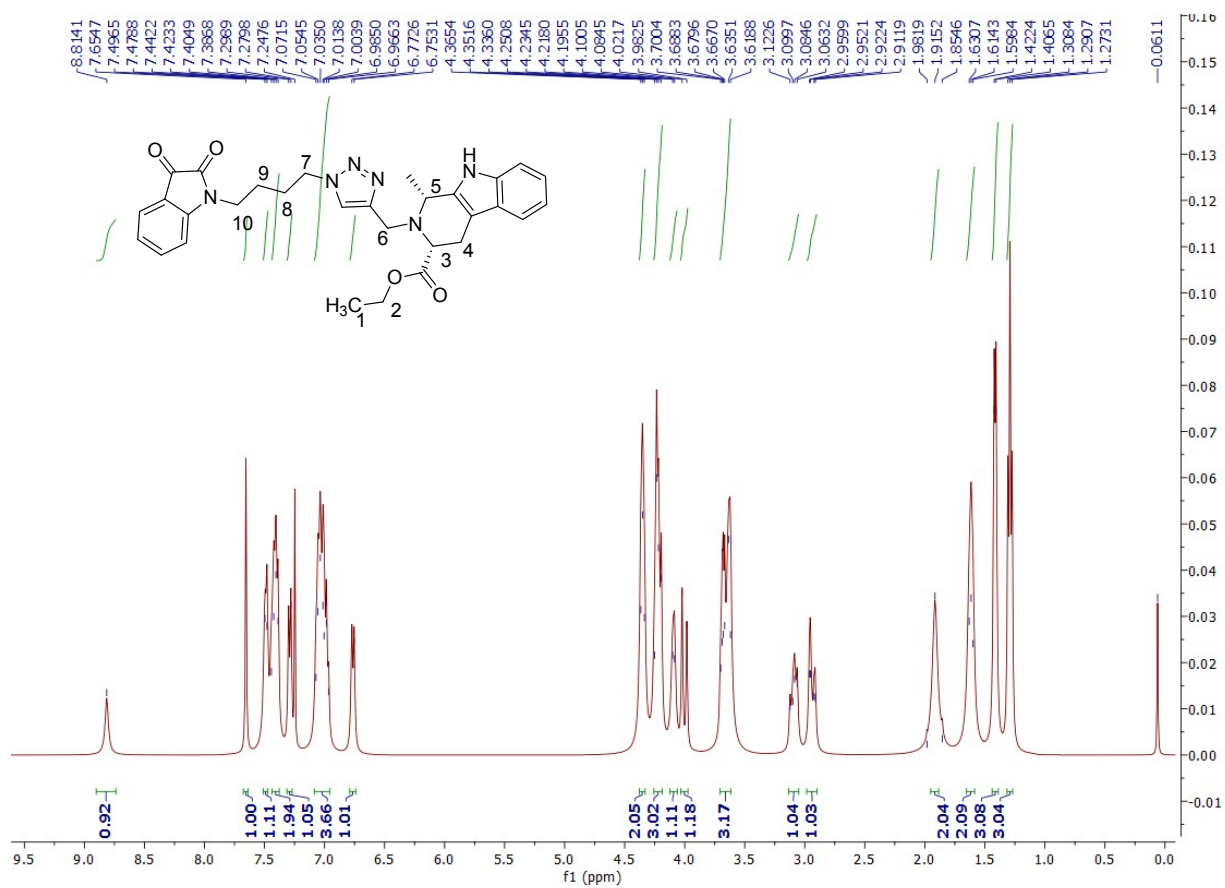

$^{13}\text{C}$  NMR of 2-{1-[4-(2,3-Dioxo-2,3-dihydro-indol-1-yl)-butyl]-1H-[1,2,3]triazol-4-ylmethyl}-1-methyl-2,3,4,9-tetrahydro-1H- $\beta$ -carboline-3-carboxylic acid ethyl ester (**8f**)

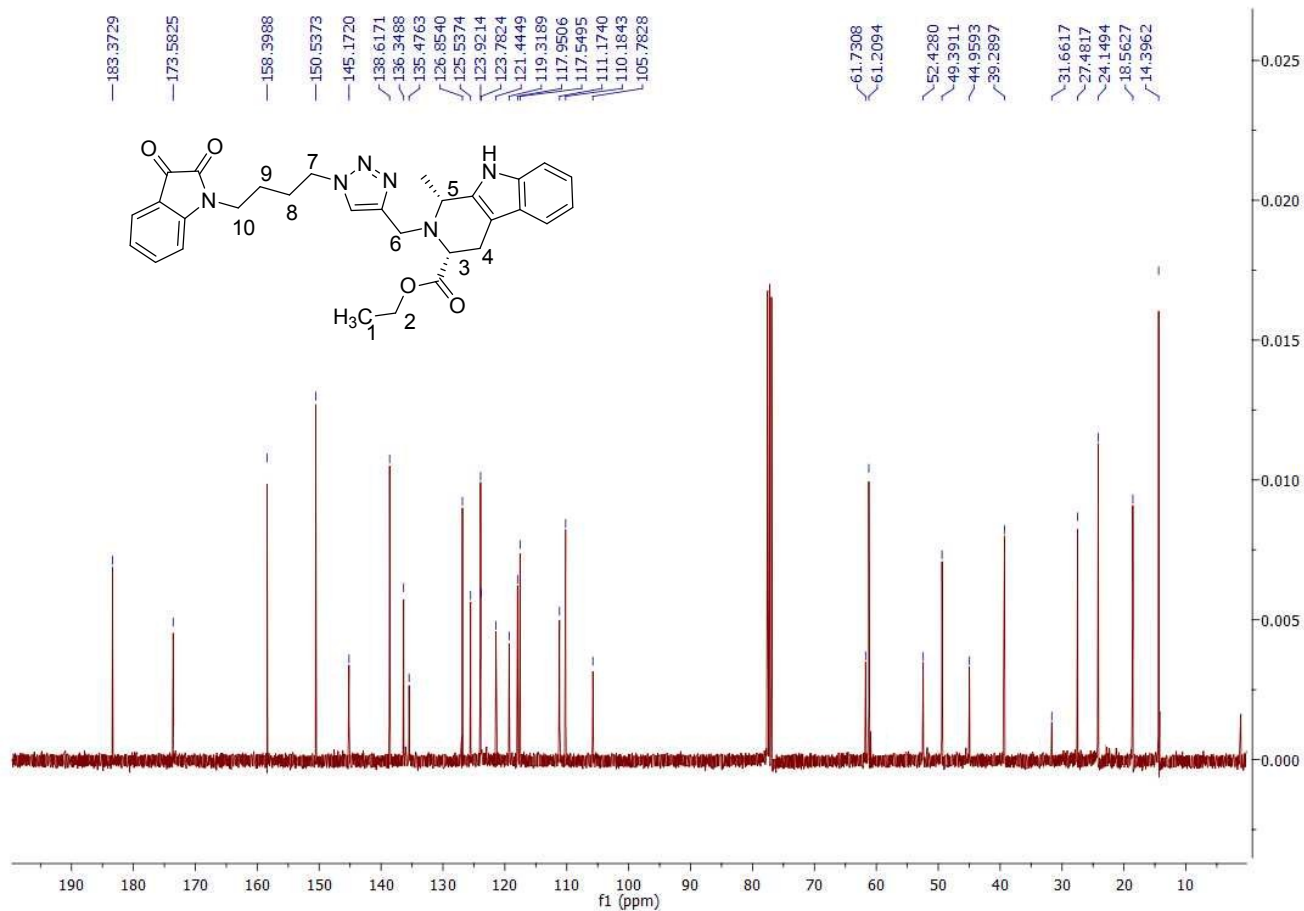

<sup>1</sup>H NMR of 2-{1-[3-(2,3-Dioxo-2,3-dihydro-indol-1-yl)-propyl]-1H-[1,2,3]triazol-4-ylmethyl}-1-phenyl-2,3,4,9-tetrahydro-1H-β-carboline-3-carboxylic acid ethyl ester (**8g**)

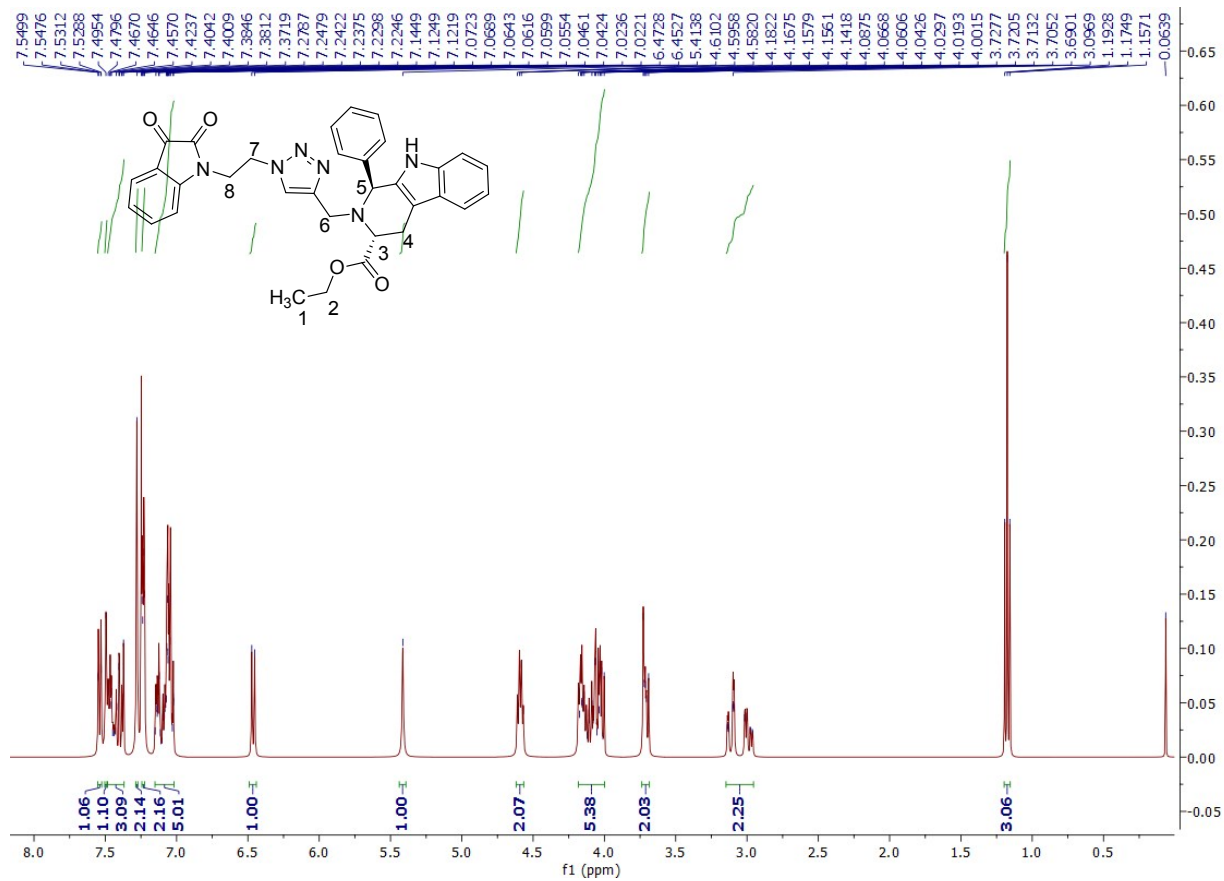



<sup>13</sup>C NMR of 2-[1-[3-(2,3-Dioxo-2,3-dihydro-indol-1-yl)-propyl]-1H-[1,2,3]triazol-4-ylmethyl]-1-phenyl-2,3,4,9-tetrahydro-1H-β-carboline-3-carboxylic acid ethyl ester (**8g**)

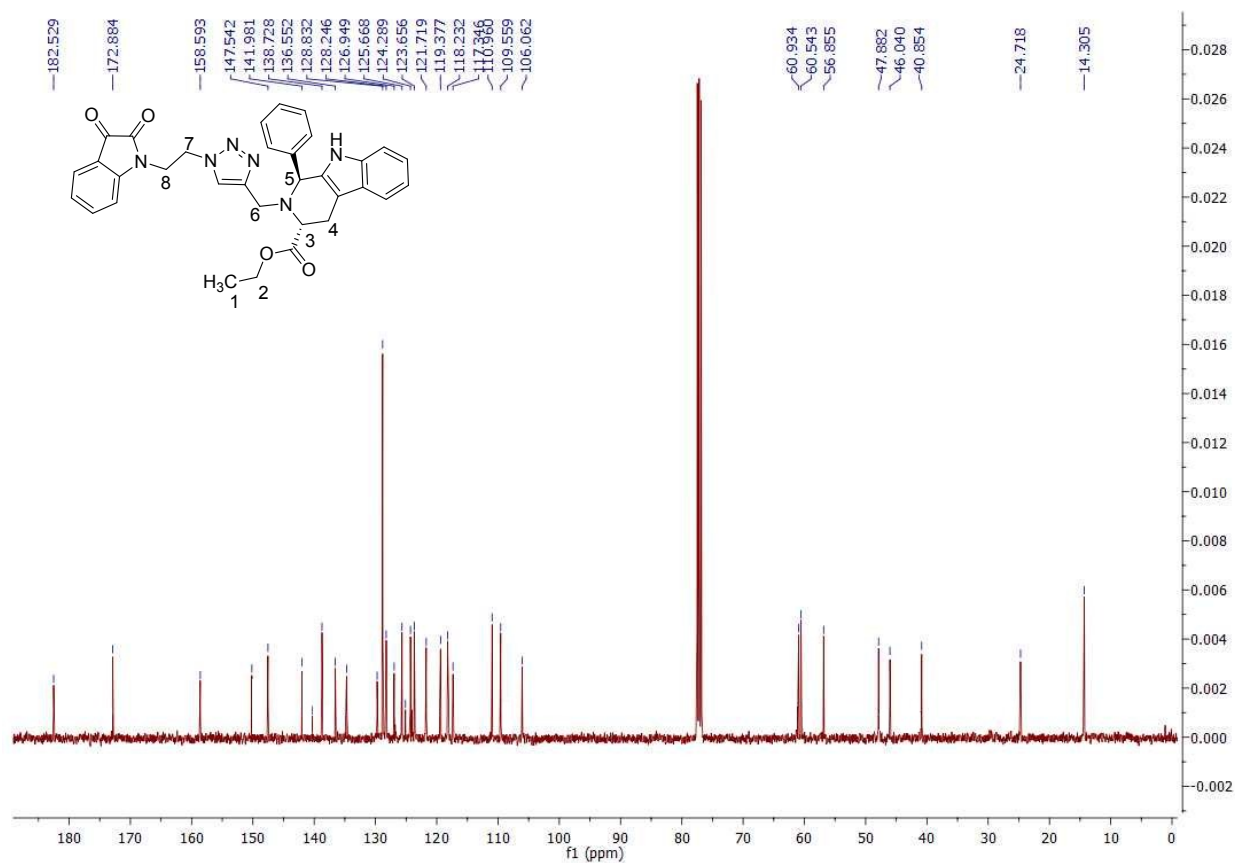

<sup>1</sup>H NMR of 2-{1-[3-(2,3-Dioxo-2,3-dihydro-indol-1-yl)-propyl]-1H-[1,2,3]triazol-4-ylmethyl}-1-phenyl-2,3,4,9-tetrahydro-1H-β-carboline-3-carboxylic acid ethyl ester (**8h**)

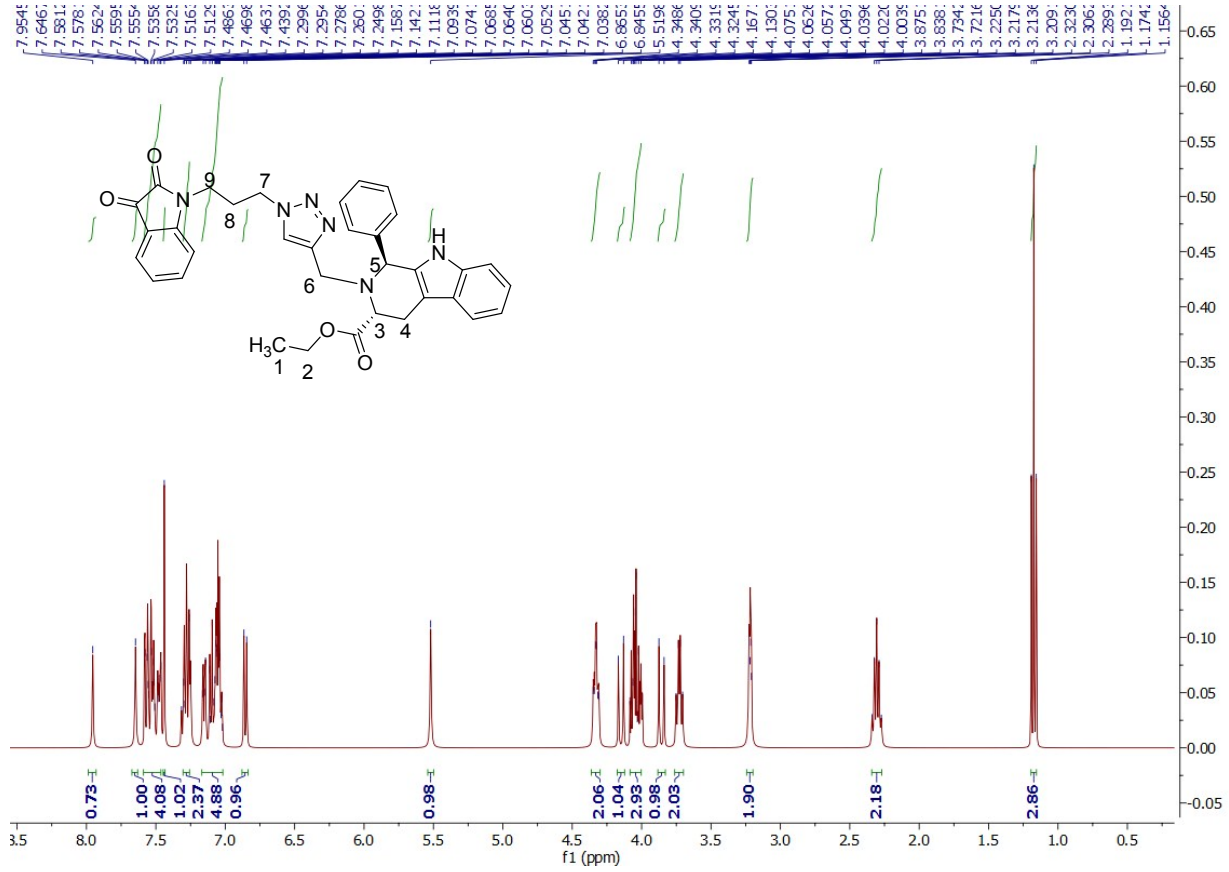

$^{13}\text{C}$  NMR of 2-{1-[3-(2,3-Dioxo-2,3-dihydro-indol-1-yl)-propyl]-1H-[1,2,3]triazol-4-ylmethyl}-1-phenyl-2,3,4,9-tetrahydro-1H- $\beta$ -carboline-3-carboxylic acid ethyl ester (**8h**)

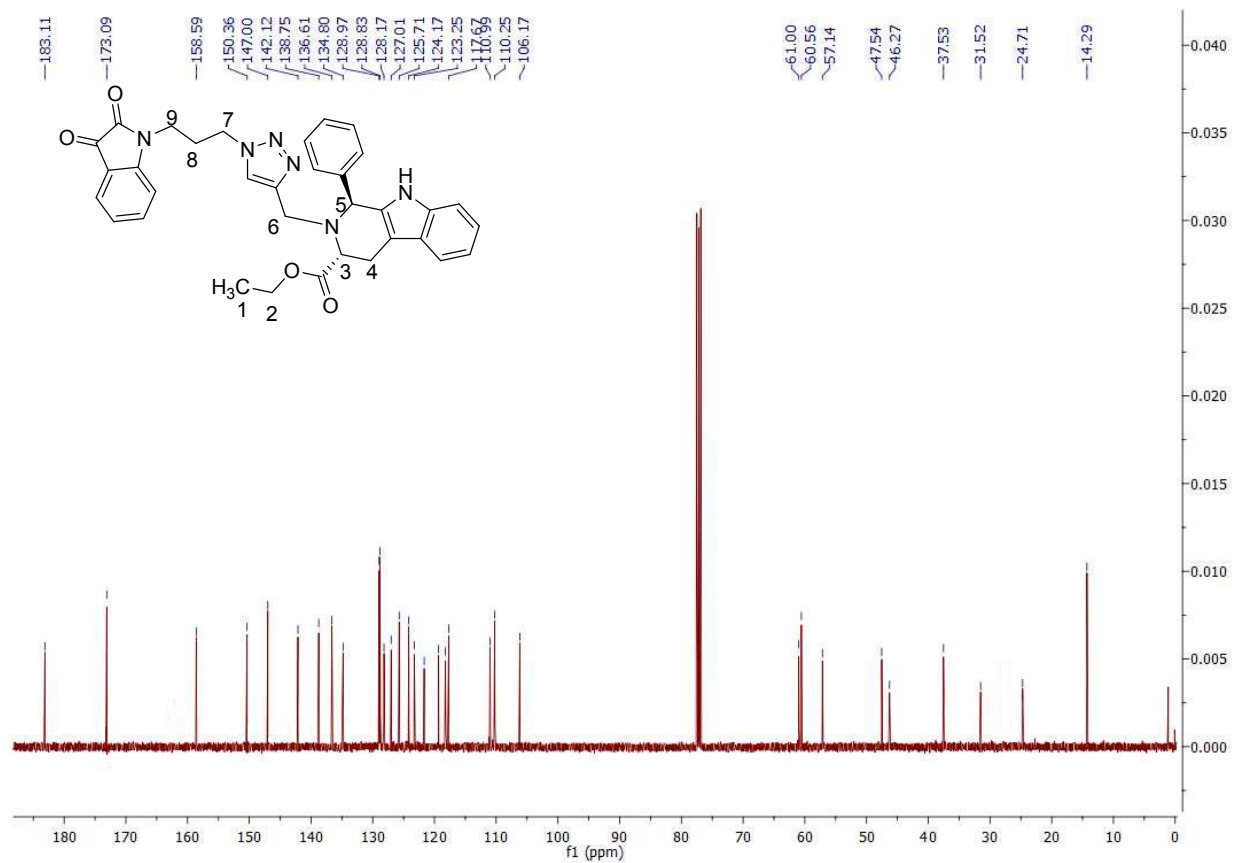

<sup>1</sup>H NMR of 2-{1-[4-(2,3-Dioxo-2,3-dihydro-indol-1-yl)-butyl]-1H-[1,2,3]triazol-4-ylmethyl}-1-phenyl-2,3,4,9-tetrahydro-1H-β-carboline-3-carboxylic acid ethyl ester (**8i**)

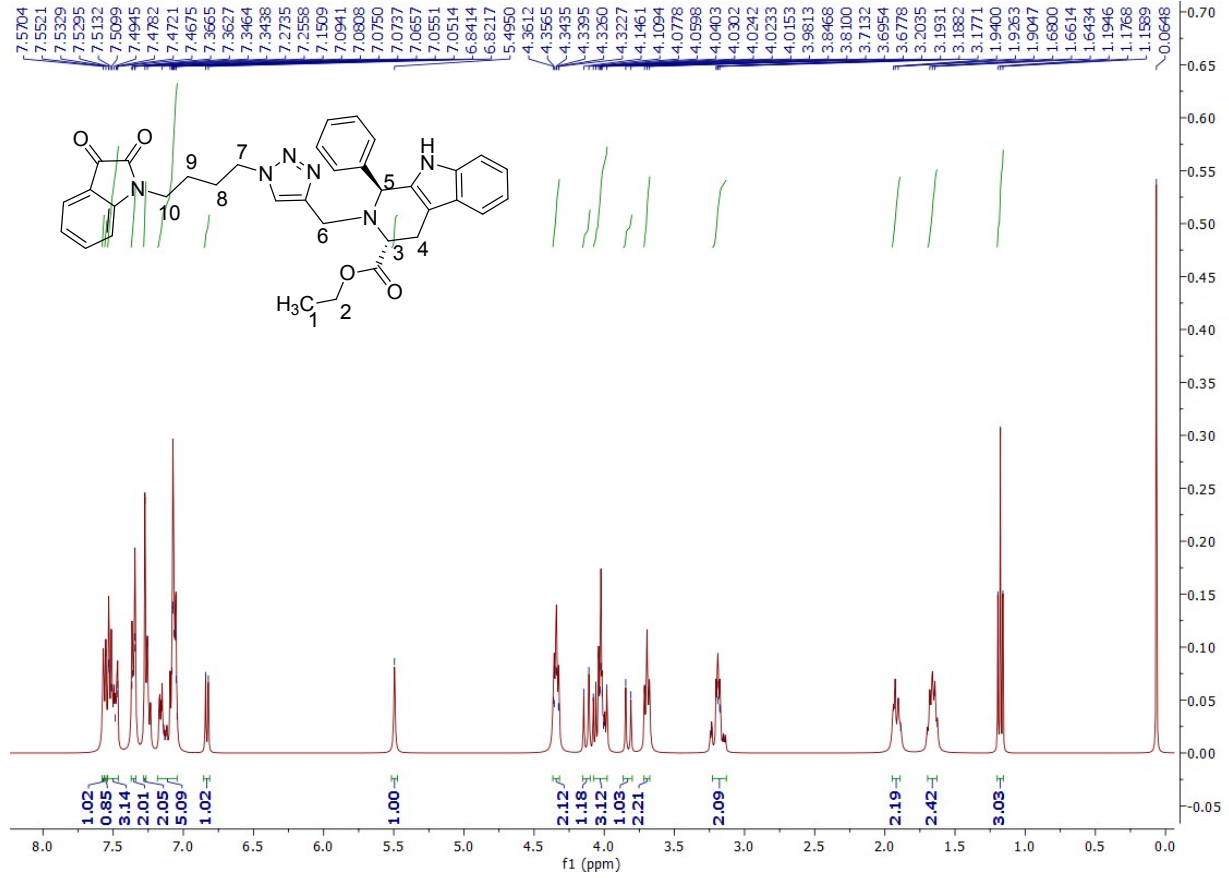

$^{13}\text{C}$  NMR of 2-{1-[4-(2,3-Dioxo-2,3-dihydro-indol-1-yl)-butyl]-1H-[1,2,3]triazol-4-ylmethyl}-1-phenyl-2,3,4,9-tetrahydro-1H- $\beta$ -carboline-3-carboxylic acid ethyl ester (**8i**)

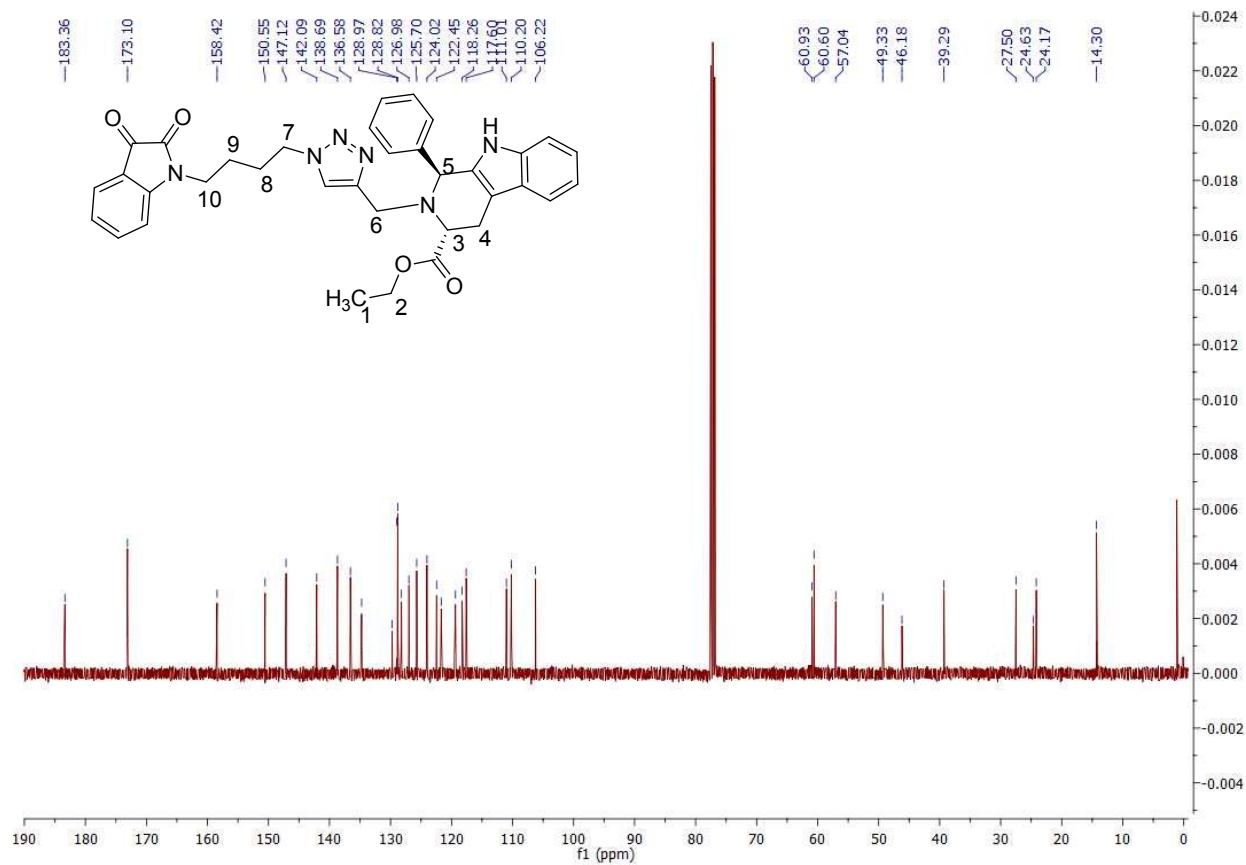

<sup>1</sup>H NMR of 2-{1-[2-(5-Fluoro-2,3-dioxo-2,3-dihydro-indol-1-yl)-ethyl]-1H-[1,2,3]triazol-4-ylmethyl}-2,3,4,9-tetrahydro-1H-β-carboline-3-carboxylic acid ethyl ester (**8j**)

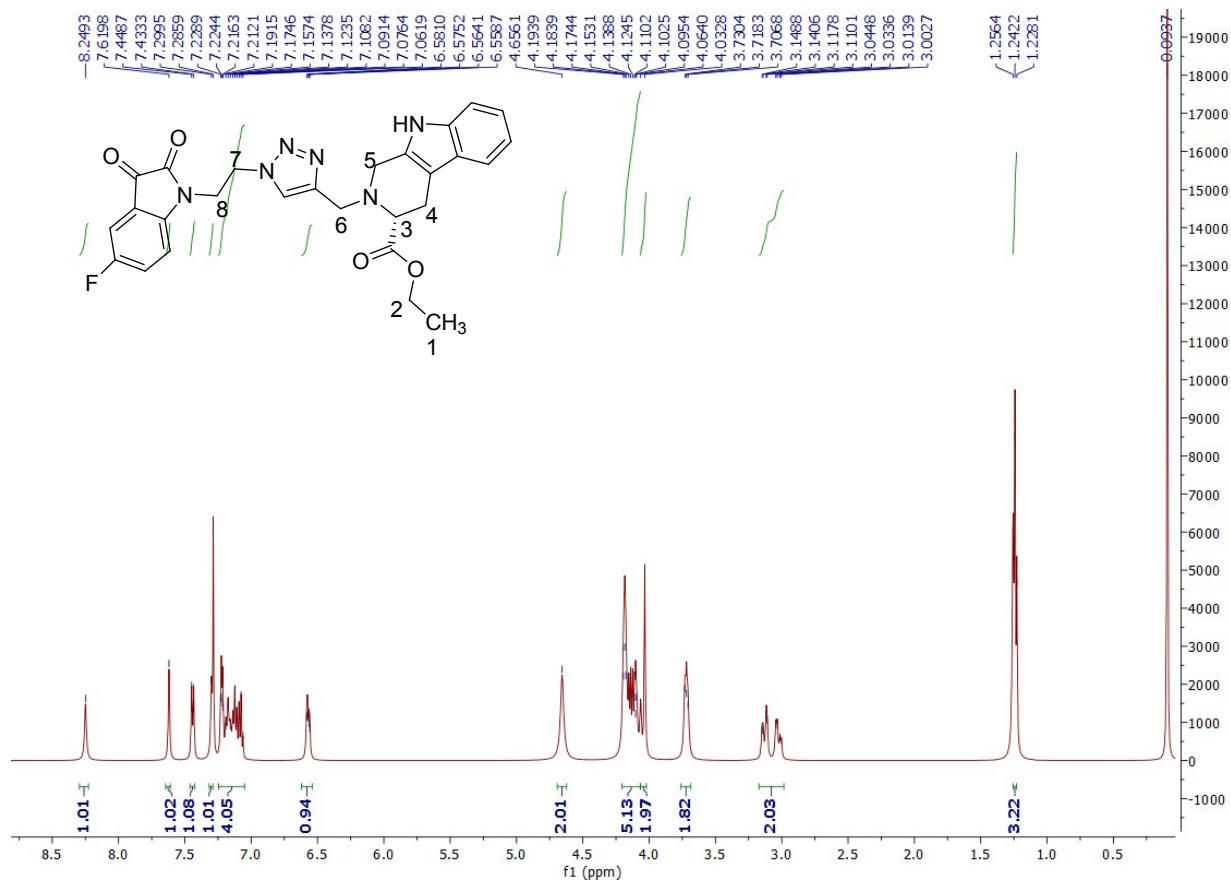

<sup>13</sup>C NMR of 2-{1-[2-(5-Fluoro-2,3-dioxo-2,3-dihydro-indol-1-yl)-ethyl]-1H-[1,2,3]triazol-4-ylmethyl}-2,3,4,9-tetrahydro-1H-β-carboline-3-carboxylic acid ethyl ester (**8j**)

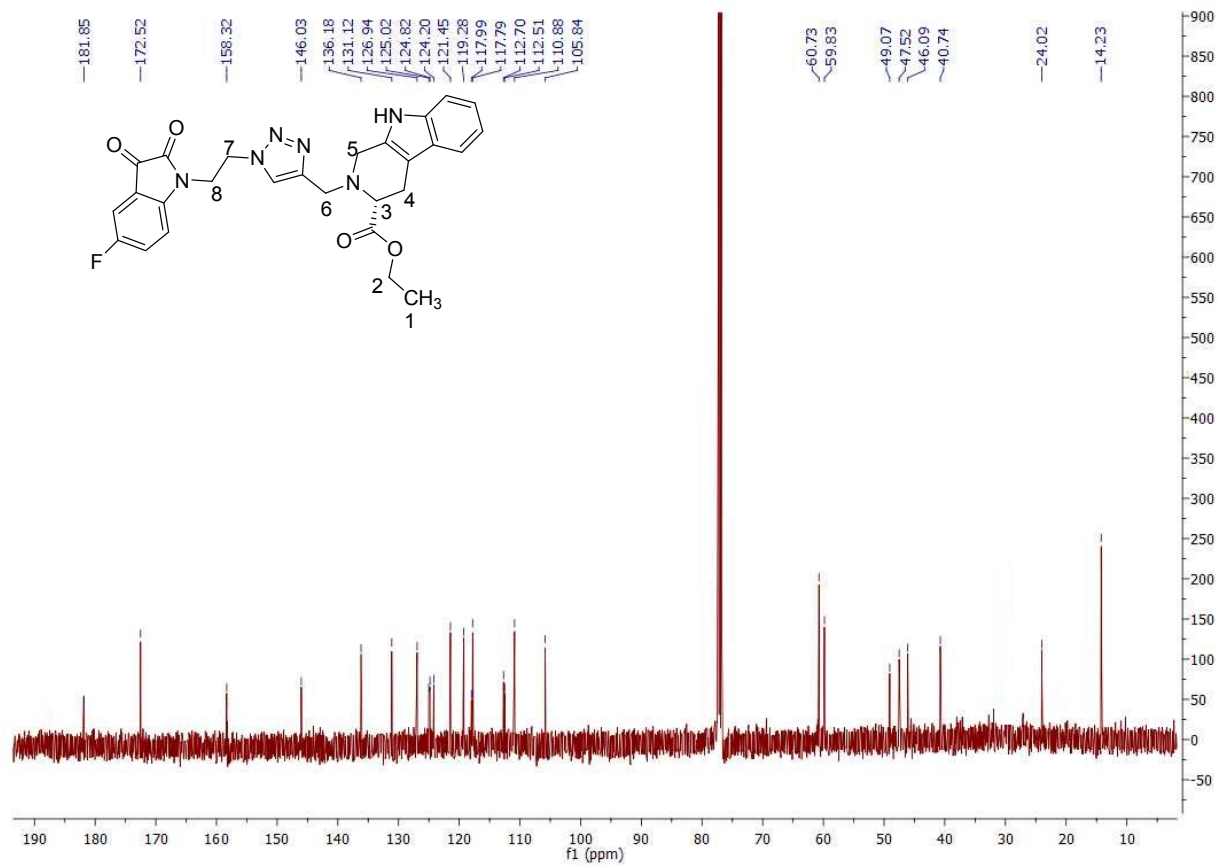

**Table 3:** Physical properties of the docked compounds

| Compound ID | logP | TPSA/ Å <sup>2</sup> | Rotatable bonds | Molecular Weight/<br>g.mol <sup>-1</sup> | Pharmacophore features |        |                         |
|-------------|------|----------------------|-----------------|------------------------------------------|------------------------|--------|-------------------------|
|             |      |                      |                 |                                          | Acceptors              | Donors | Ionisable groups/charge |
| 8b          | 2.27 | 110.01               | 9               | 514.58                                   | 6                      | 3      | 1/-                     |
| 8d          | 2.17 | 110.01               | 8               | 514.58                                   | 6                      | 3      | 1/-                     |
| 8e          | 2.43 | 110.01               | 9               | 528.60                                   | 6                      | 3      | 1/+                     |
| 8r          | 3.94 | 110.01               | 11              | 622.69                                   | 7                      | 3      | 1/-                     |

**Table 4**

| Grid Point Parameters    |           |
|--------------------------|-----------|
| Grid center co-ordinates | Grid size |
| X = 30.173               | X = 40    |
| Y = -1.997               | Y = 30    |
| Z = 24.207               | Z = 40    |
